# Supplementary material for: Employing Escherichia coli-derived outer membrane vesicles as an antigen delivery platform elicits protective immunity against Acinetobacter baumannii infection
Source: PubMed Central journal article supplement (PMC5110958; doi:10.1038/srep37242), 2016-11-16

1 **Employing *Escherichia coli*-derived outer membrane vesicles as an**  
2 **antigen delivery platform elicits protective immunity against**  
3 ***Acinetobacter baumannii* infection**

4

5 **Weiwei Huang<sup>1,2,3</sup>, Shijie Wang<sup>1,2,3</sup>, Yufeng Yao<sup>1,2,3</sup>, Ye Xia<sup>1,2,3</sup>, Xu Yang<sup>1,2,3</sup>, Kui Li<sup>1,2,3</sup>, Pengyan**  
6 **Sun<sup>1,2,3</sup>, Cunbao Liu<sup>1,2,3</sup>, Wenjia Sun<sup>1,2,3</sup>, Hongmei Bai<sup>1,2,3</sup>, Xiaojie Chu<sup>1,2,3</sup>, Yang Li<sup>1,2,3</sup>, Yanbing**  
7 **Ma<sup>1,2,3\*</sup>**

8 <sup>1</sup> Laboratory of Molecular Immunology, Institute of Medical Biology, Chinese Academy of Medical  
9 Sciences & Peking Union Medical College; Kunming, China 650118, <sup>2</sup>Yunnan Key Laboratory of Vaccine  
10 Research & Development on Severe Infectious Diseases; Kunming, China 650118, <sup>3</sup>Yunnan Engineering  
11 Research Center of Vaccine Research and Development on Severe Infectious Diseases, Kunming,  
12 China 650118.

13

14 **\*Corresponding:**

15 Prof. Yanbing Ma

16 Laboratory of Molecular Immunology,

17 Institute of Medical Biology,

18 Chinese Academy of Medical Sciences & Peking Union Medical College,

19 Kunming, China 650118

20 Phone: +86 871 68339287

21 Fax: +86 871 68334483

22 Email: [yanbingma1969@126.com](mailto:yanbingma1969@126.com)

23 **Supplementary figure legends**

24 **Supplementary figure 1. The DNA sequencing graph of ClyA gene**

25 DNA sequencing was used to analyze the ClyA gene from a clinical pathogenic *E.coli* W-15 and  
26 non-pathogenic *E.coli* DH5 $\alpha$ , the result shows the ClyA gene from the DH5 $\alpha$  strain lacked a C base at  
27 position 217 and an A base at position 493 (Black arrow).

28

29 **Supplementary Figure 1**

30

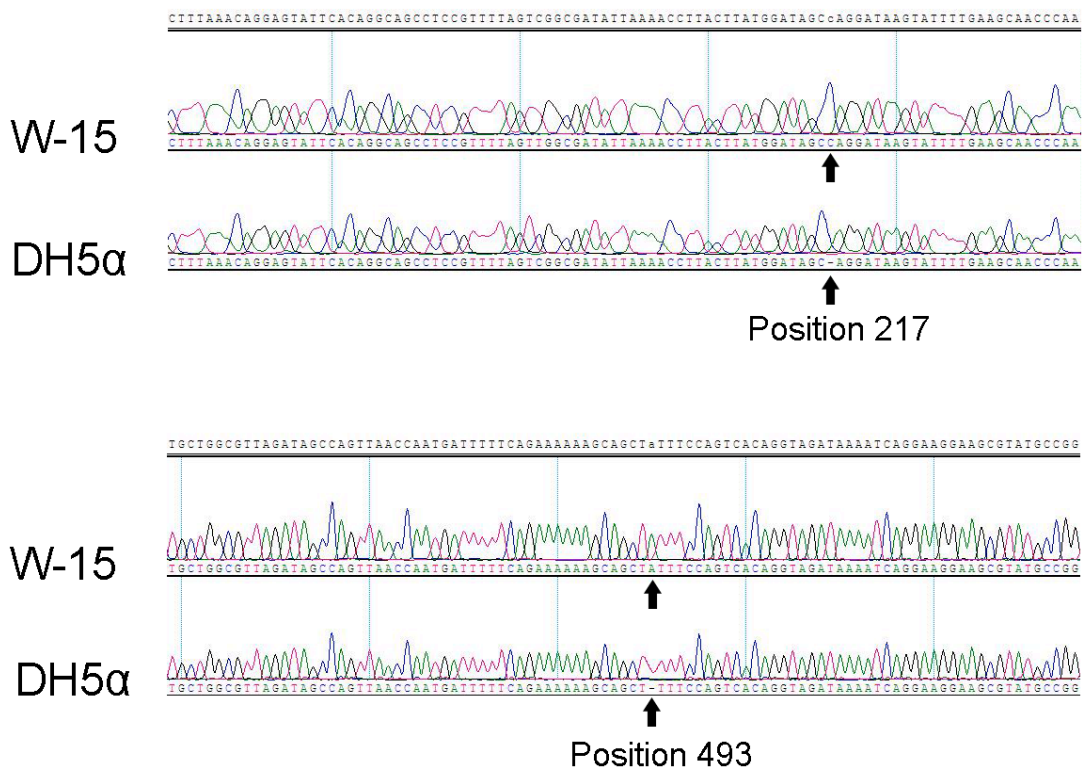

Supplement: srep37242-s1.pdf [file srep37242-s1.pdf]
